# Supplementary material
Source: Springer Nature journal article supplement (https://www.springermedizin.de/resource/supplementary/13058_2013_3419_MOESM6_ESM.pdf/9704106)
Supplement: MOESM6 [file 9704106]

**Outgrowth potential of normal mammary epithelial cell subpopulations sorted for ER in the humanized fat pad of NOD/scid mice.**

|                    | <b>Outgrowth/injections</b> |                   |                   |                   |
|--------------------|-----------------------------|-------------------|-------------------|-------------------|
|                    | $8 \times 10^5$             | $2.5 \times 10^5$ | $1.5 \times 10^5$ | $2.5 \times 10^4$ |
| <b>ER-positive</b> | 1/1                         | 2/2               | 4/4               | 1/4               |
| <b>ER-negative</b> | 1/1                         | 2/2               | 4/4               | 4/4               |
| <b>Unsorted</b>    | 1/1                         | 2/2               | 4/4               | 4/4               |
